# Supplementary material
Source: PubMed Central journal article supplement (PMC5071579)
Supplement: cdd201699x5.pdf [file cdd201699x5.pdf]

# Supplementary Figure S5.

**a**

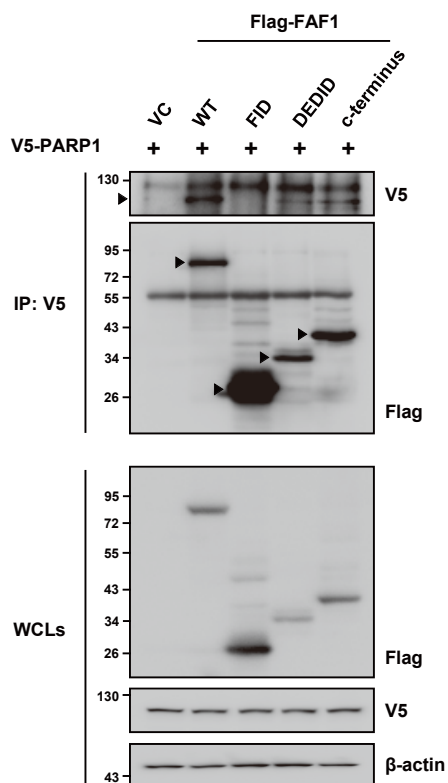

**b**

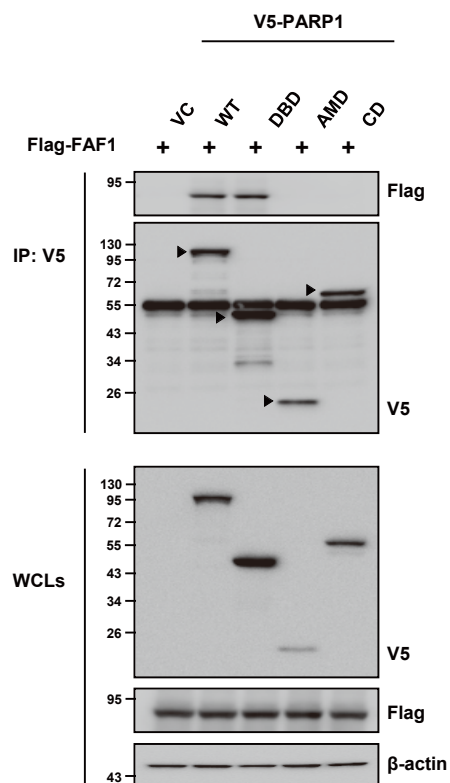

| FAF1 Variant    | Residues                         | binds to PARP1 |
|-----------------|----------------------------------|----------------|
| FAF1-WT         | 1 [FID] [DEDID] [c-terminus] 650 | +              |
| FAF1-FID        | 1 [FID] 180                      | -              |
| FAF1-DEDID      | 181 [DEDID] 381                  | +              |
| FAF1-c-terminus | 382 [c-terminus] 650             | +              |

| PARP1 Variant | Residues                | binds to FAF1 |
|---------------|-------------------------|---------------|
| PARP1-WT      | 1 [DBD] [AMD] [CD] 1014 | +             |
| PARP1-DBD     | 1 [DBD] 372             | +             |
| PARP1-AMD     | 373 [AMD] 524           | -             |
| PARP1-CD      | 525 [CD] 1014           | -             |
