# Supplementary material
Source: PubMed Central journal article supplement (PMC5071579)

## Supplementary Figure S1.

**a**

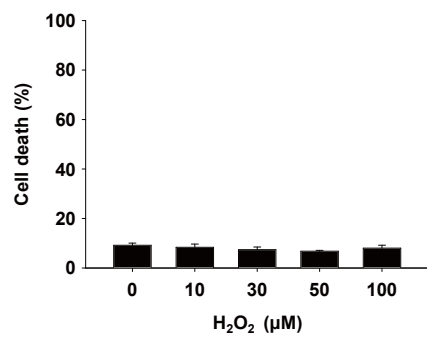

**b**

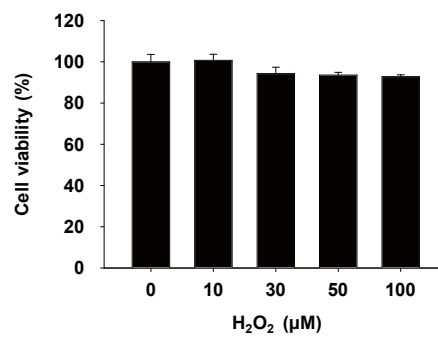

Supplement: cdd201699x1.pdf [file cdd201699x1.pdf]

# Supplementary Figure S3.

**a**

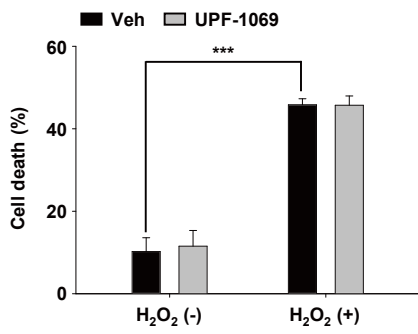

**b**

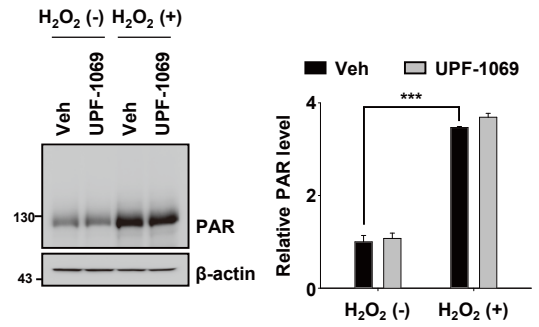

**c**

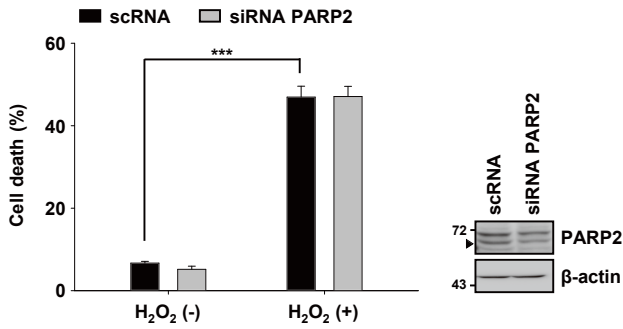

**d**

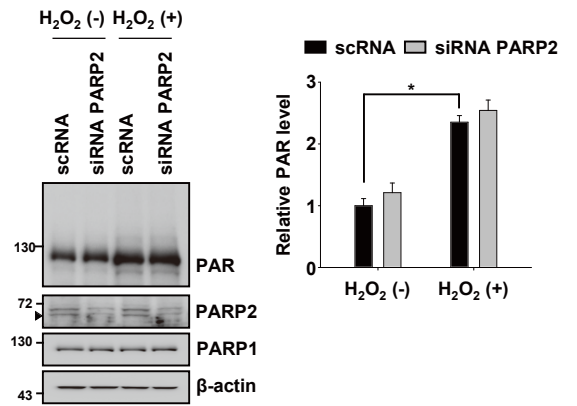

Supplement: cdd201699x3.pdf [file cdd201699x3.pdf]

## Supplementary Figure S4.

**a**

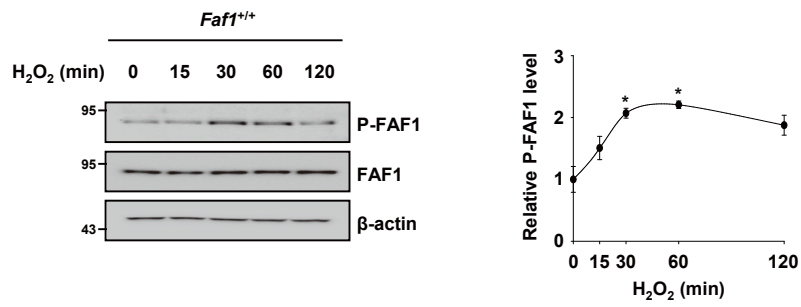

**b**

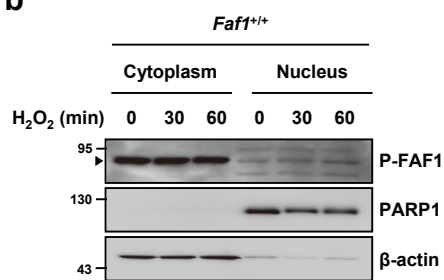

**c**

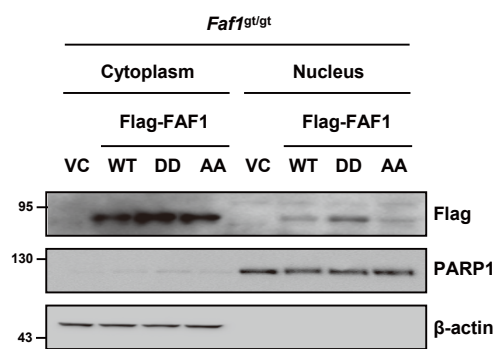

Supplement: cdd201699x4.pdf [file cdd201699x4.pdf]

# Supplementary Figure S6.

**a**

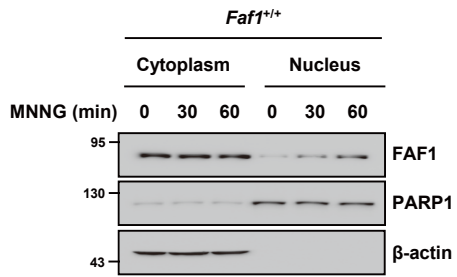

**b**

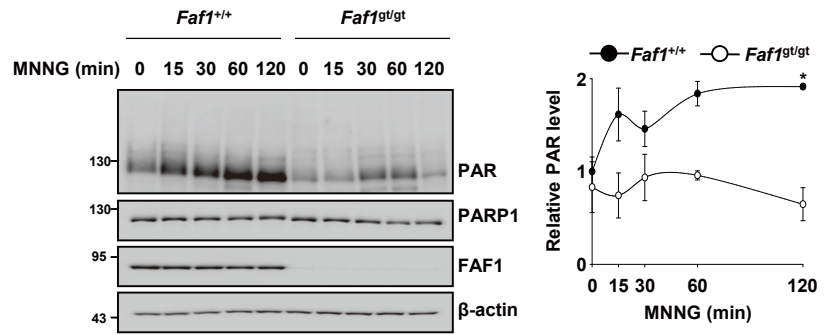

Supplement: cdd201699x6.pdf [file cdd201699x6.pdf]

# Supplementary Figure S8.

**a**

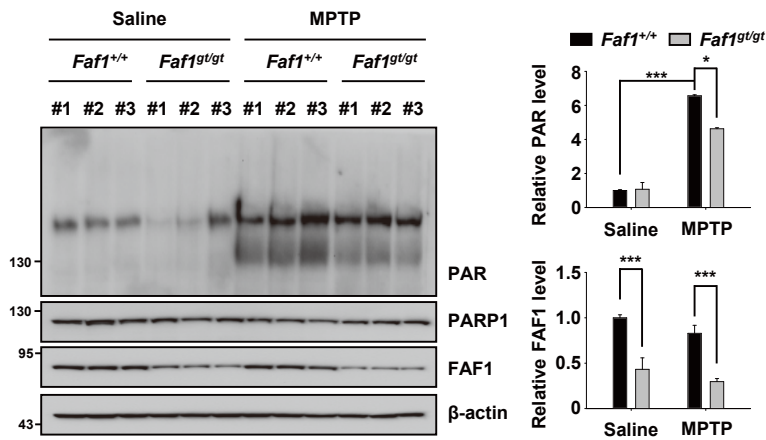

**b**

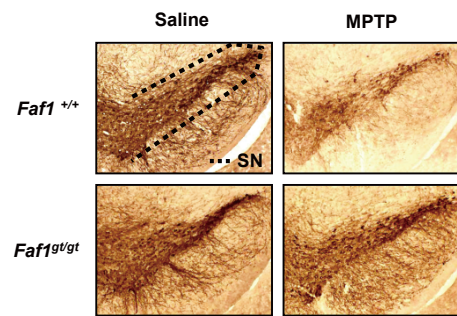

**c**

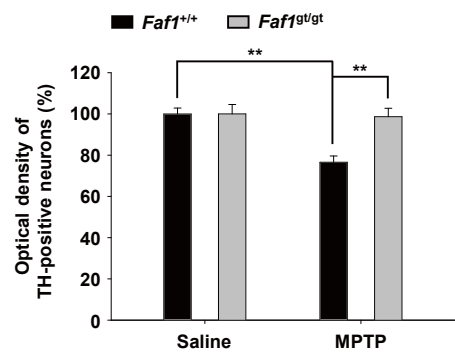

**d**

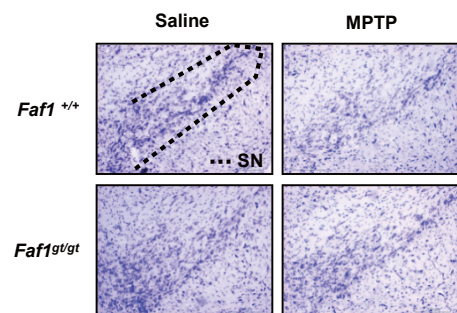

**e**

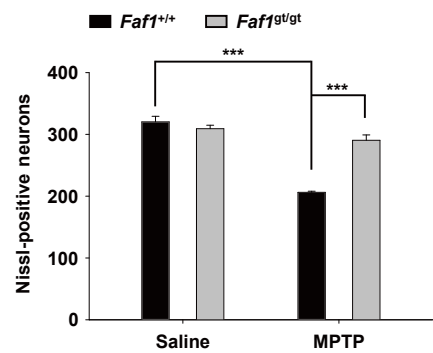

Supplement: cdd201699x8.pdf [file cdd201699x8.pdf]
